# Supplementary material for: Molecular Dynamics Simulation Study of the Selective Inhibition of Coagulation Factor IXa over Factor Xa
Source: MDPI journal article supplement (doi:10.3390/molecules28196909), 2023-10-02
Supplement: s1 [file s1]

# Supplementary Materials: Molecular Dynamics Simulation Study of the Selective Inhibition of Coagulation Factor IXa over Factor Xa

Hyun Jung Yoon <sup>1</sup>, Sibsankar Kundu <sup>2</sup> and Sangwook Wu <sup>1,2,\*</sup>

<sup>1</sup> Department of Physics, Pukyong National University, Busan 48513, Republic of Korea; hjyoon@pukyong.ac.kr

<sup>2</sup> R&D Center, PharmCADD Co., Ltd., Busan, 48792, Republic of Korea; sskundu@gmail.com

\* Correspondence: sangwoow@pknu.ac.kr

Blood coagulation, essential for hemostasis, is a complex physiological process that ensures clot formation upon blood vessel injury, preventing excessive bleeding and maintaining normal blood flow under physiological conditions. Hemostasis involves a cascade of enzymatic reactions, with multiple target proteins belonging to the S1A sub-family of serine proteases, collectively referred to as coagulation factors. Figure S1 provides a concise overview of the basic coagulation mechanism. The complex coagulation process is operated through a cascading mechanism, subdivided into three smaller pathways, namely the intrinsic pathway, extrinsic pathway, and common pathway. The intrinsic pathway is triggered by blood vessel injury, while the extrinsic pathway is triggered by tissue injury. Downstream propagation of the intrinsic pathway involves the conversion of FXII to FXIIa, FXI to FXIa, and FIX to FIXa, while the extrinsic pathway propagates through the conversion of FVII to FVIIa with the assistance of tissue factor (TF). These two pathways merge into a common pathway, converting FX to FXa, and continue downstream with the conversion of to thrombin, ultimately leading to fibrillation or fibrin clot formation. FIXa and FXa are indicated by red enclosing boxes in Figure S1, illustrating how FIXa selectively regulates the intrinsic pathway without affecting the extrinsic pathway.

**Direct and Indirect Regulation :** The earliest therapies used as anticoagulants for thromboembolic disorders are heparin and warfarin, but these agents regulate the coagulation process through the indirect pathway and have limited use due to their bleeding risk [1–3] and in the event of emergencies. Therefore, the better therapeutic strategy has emerged in the form of Direct Oral AntiCoagulants (DOACs), which are also known as Novel Oral AntiCoagulants (NOACs) or Non-vitamin K mediated Oral AntiCoagulants (not indirect).

**Description of long activesite and long ligand :** The inhibitor binding sites or active sites in FIXa and FXa are considerably long. To facilitate the study and analysis of structure-activity relationships (SAR) and their pharmacological behavior, the long active site is divided into several subsites, specifically denoted as S1, S2, S3, and S4. Similarly, the extended ligand that binds to this active site and extends from the S1 subsite through S2 and S3 up to the S4 subsite, is also segmented into corresponding fragments denoted as P1, P2, P3, and P4.

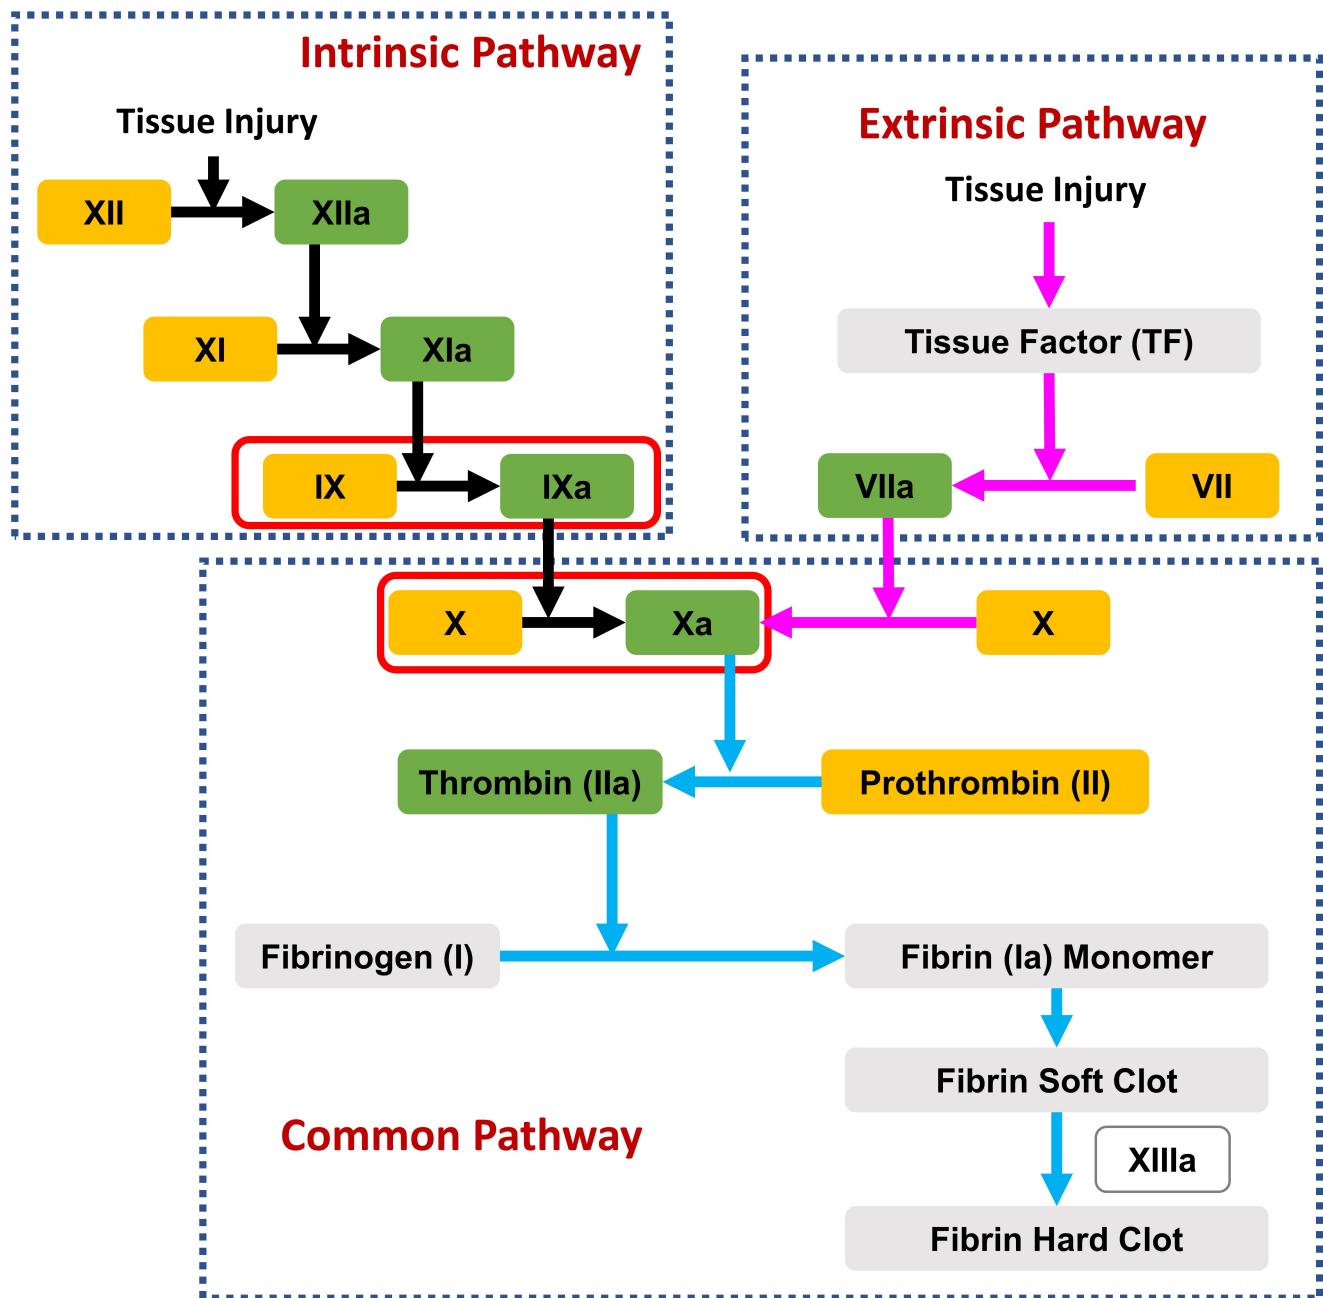

**Figure S1.** The cascading mechanism of blood coagulation process. The figure shows that FXa is in the first step of common pathway and FIXa is under the intrinsic pathway. The Activated and inactive factors are marked in green and orange, respectively.



**(a) Dataset 1. FIXa selective**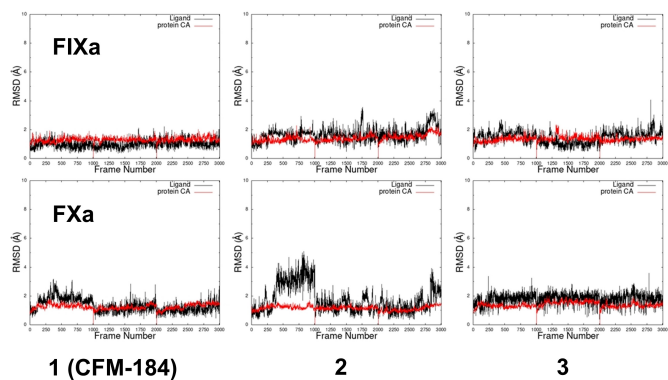**(b) Dataset 2. FXa selective**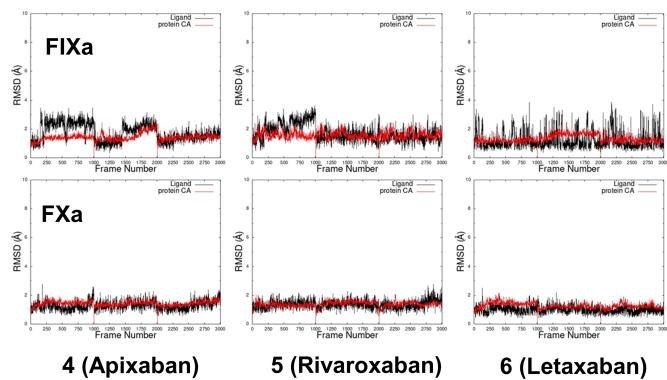**(c) Dataset 3. Active for both FIXa & FXa**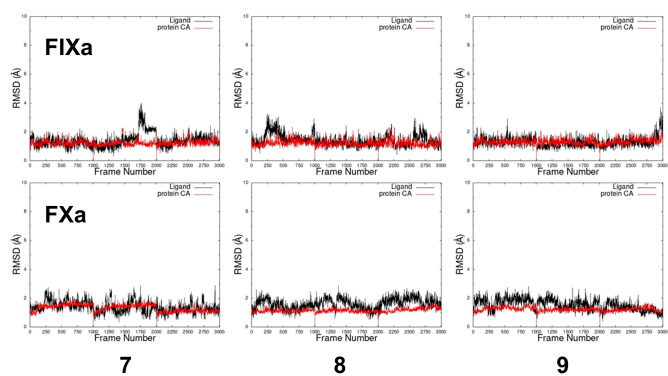**(d) Dataset 4. Inactive for both FIXa & FXa**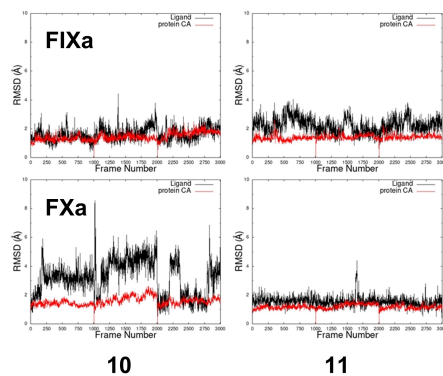

**Figure S2.** RMSD profiles of protein C $\alpha$  (Red) and ligand heavy atom (Black) during entire trajectory of 3 replicated 100ns MD simulations (0-1000 : Run 1, 1001 - 2000 : Run 2, 2001-3000 : Run 3). All structure aligned to protein C $\alpha$  atoms of first frame, and then calculated RMSD.

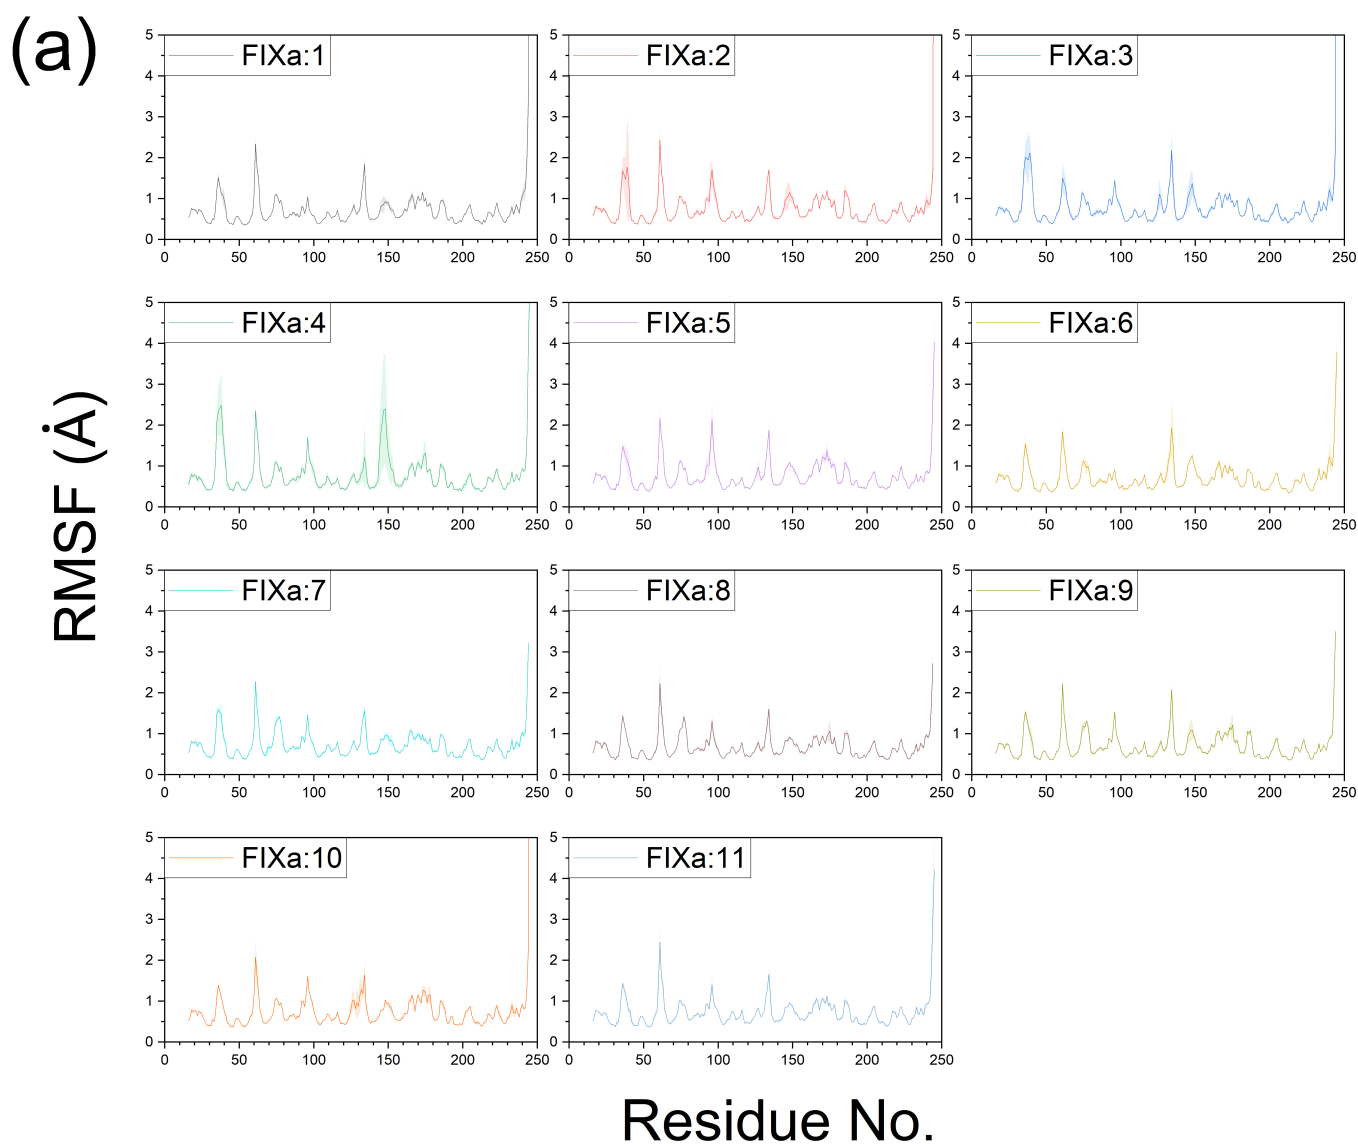

(a) The RMSF plots of the FIXa complexes.

**Figure S3.** The average RMSF plots with standard deviation of heavy chain during 3 replicated 100 ns simulations.

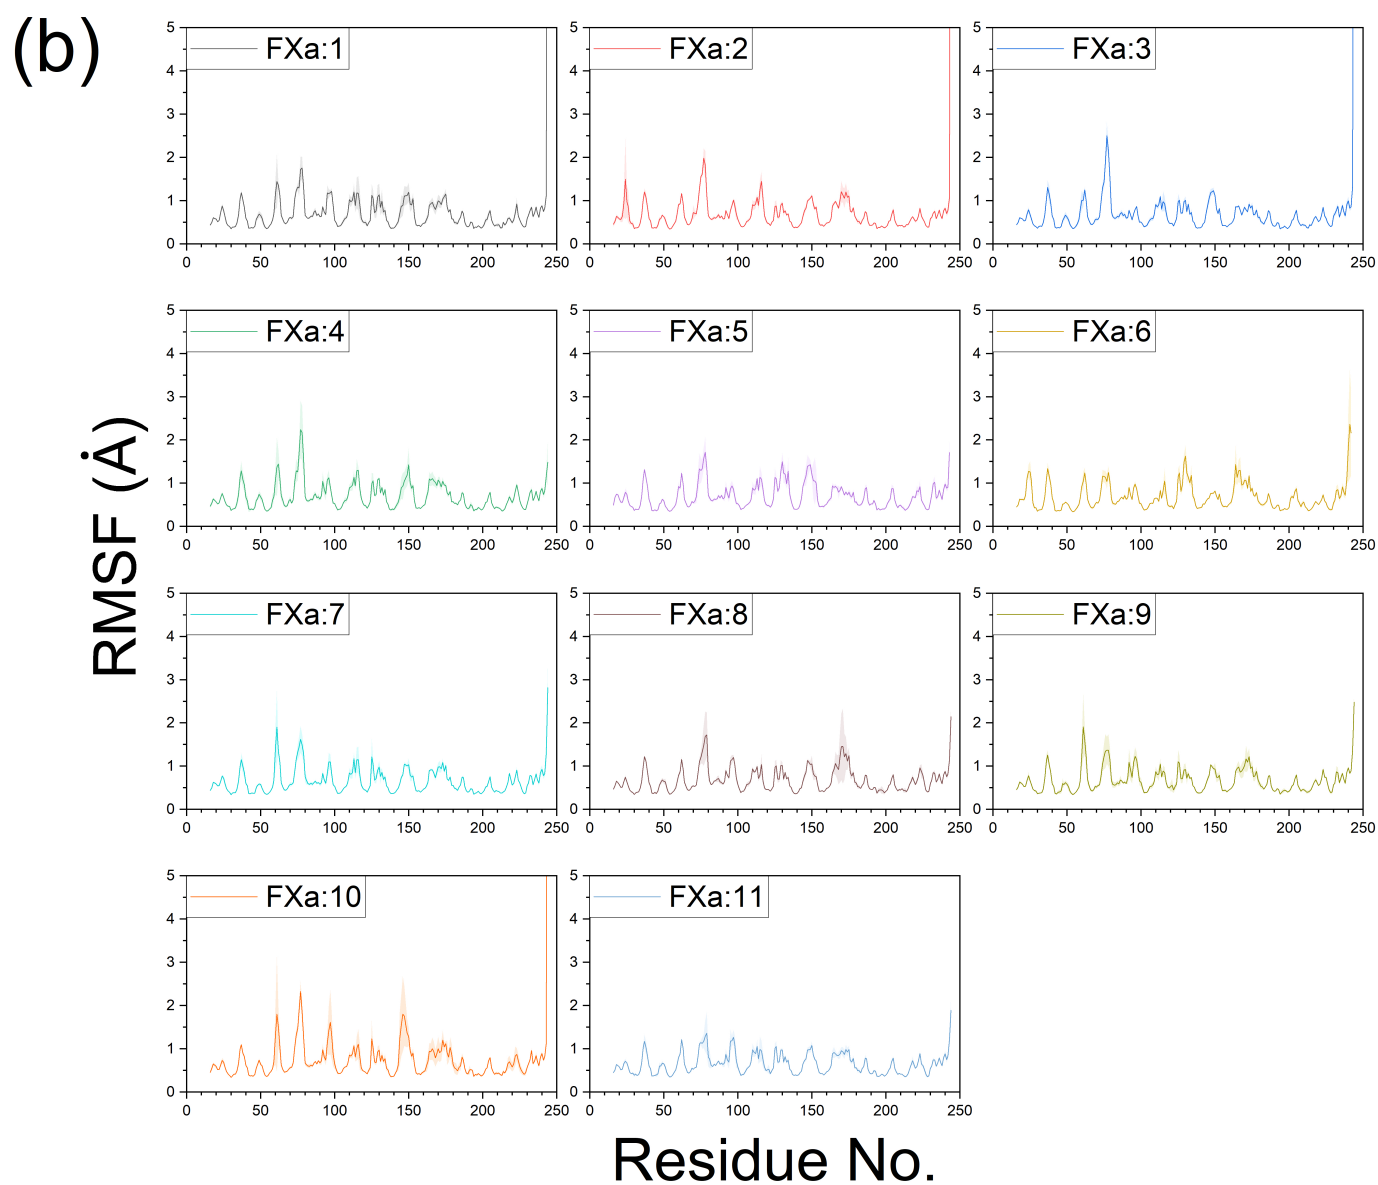

(b) The RMSF plots of the FXa complexes.

**Figure S3.** The average RMSF plots with standard deviation of heavy chain during 3 replicated 100 ns simulations.

| Data 1 : FIXa selective              |                  |             |         |                  |             |         |                  |             |
|--------------------------------------|------------------|-------------|---------|------------------|-------------|---------|------------------|-------------|
| FIXa:1                               |                  |             | FIXa:2  |                  |             | FIXa:3  |                  |             |
| Residue                              | Average (kJ/mol) | StDev (+/-) | Residue | Average (kJ/mol) | StDev (+/-) | Residue | Average (kJ/mol) | StDev (+/-) |
| G216                                 | -10.826          | 0.333       | W215    | -15.643          | 2.231       | G216    | -11.843          | 0.607       |
| W215                                 | -10.665          | 0.455       | F174    | -10.906          | 0.248       | F174    | -11.005          | 0.585       |
| Y99                                  | -10.206          | 0.900       | Y99     | -10.277          | 0.505       | W215    | -9.780           | 0.703       |
| F174                                 | -9.693           | 0.504       | Q192    | -8.037           | 1.887       | Y99     | -7.666           | 1.439       |
| C220                                 | -8.401           | 0.432       | G216    | -6.887           | 2.798       | C220    | -6.937           | 0.281       |
| Q192                                 | -8.037           | 1.062       | C220    | -5.352           | 0.664       | C191    | -5.701           | 0.317       |
| C191                                 | -4.736           | 0.242       | K224    | -4.946           | 0.458       | K224    | -5.617           | 0.064       |
| E217                                 | -4.535           | 0.513       | C191    | -4.917           | 0.759       | Q192    | -4.207           | 0.423       |
| K98                                  | -4.154           | 0.323       | K148    | -4.141           | 1.892       | E217    | -4.155           | 1.384       |
| K224                                 | -4.058           | 0.015       | K173    | -3.505           | 1.891       | D102    | -2.847           | 1.025       |
| Data 2 : Fxa selective               |                  |             |         |                  |             |         |                  |             |
| FIXa:4                               |                  |             | FIXa:5  |                  |             | FIXa:6  |                  |             |
| Residue                              | Average (kJ/mol) | StDev (+/-) | Residue | Average (kJ/mol) | StDev (+/-) | Residue | Average (kJ/mol) | StDev (+/-) |
| W215                                 | -24.333          | 0.257       | K173    | -14.331          | 9.328       | G216    | -12.642          | 0.481       |
| Y99                                  | -7.839           | 0.189       | W215    | -10.669          | 1.503       | F174    | -9.684           | 0.172       |
| Q192                                 | -7.125           | 1.729       | F174    | -9.746           | 0.331       | K148    | -9.343           | 0.998       |
| F174                                 | -6.793           | 0.164       | Y99     | -9.028           | 1.132       | K98     | -8.975           | 0.829       |
| C191                                 | -6.200           | 1.168       | Q192    | -7.678           | 1.734       | Y99     | -7.845           | 1.221       |
| C220                                 | -3.957           | 0.528       | K224    | -5.883           | 1.939       | K173    | -6.248           | 1.511       |
| G216                                 | -3.811           | 0.460       | T172    | -3.422           | 3.861       | R143    | -4.558           | 0.723       |
| K98                                  | -3.342           | 0.583       | C220    | -2.883           | 0.460       | W215    | -4.020           | 0.347       |
| K148                                 | -2.679           | 1.231       | I227    | -2.408           | 3.101       | Q192    | -3.469           | 0.378       |
| Y228                                 | -2.252           | 1.058       | K98     | -1.840           | 2.386       | C220    | -3.380           | 0.298       |
| Data3 : Active for both FIXa & Fxa   |                  |             |         |                  |             |         |                  |             |
| FIXa:7                               |                  |             | FIXa:8  |                  |             | FIXa:9  |                  |             |
| Residue                              | Average (kJ/mol) | StDev (+/-) | Residue | Average (kJ/mol) | StDev (+/-) | Residue | Average (kJ/mol) | StDev (+/-) |
| W215                                 | -15.718          | 0.152       | W215    | -15.124          | 0.097       | W215    | -15.515          | 0.399       |
| Q192                                 | -12.705          | 4.471       | F174    | -11.249          | 0.188       | F174    | -10.787          | 0.424       |
| F174                                 | -11.790          | 0.276       | G216    | -8.833           | 0.352       | Q192    | -9.250           | 1.808       |
| G216                                 | -10.152          | 0.843       | Q192    | -8.447           | 0.989       | Y99     | -9.094           | 0.996       |
| Y99                                  | -9.817           | 1.396       | Y99     | -8.052           | 1.051       | G216    | -8.691           | 0.632       |
| C191                                 | -5.967           | 2.806       | C191    | -7.036           | 0.603       | C191    | -5.783           | 2.097       |
| K224                                 | -3.592           | 0.428       | C220    | -3.788           | 0.252       | C220    | -3.353           | 0.670       |
| C220                                 | -3.461           | 0.611       | V16     | -2.628           | 0.560       | K224    | -2.837           | 0.181       |
| K148                                 | -2.653           | 0.464       | K224    | -2.071           | 0.223       | V16     | -2.814           | 0.418       |
| V16                                  | -2.370           | 0.456       | E217    | -1.994           | 0.487       | I213    | -2.169           | 0.088       |
| Data4 : Inactive for both FIXa & Fxa |                  |             |         |                  |             |         |                  |             |
| FIXa:10                              |                  |             | FIXa:11 |                  |             |         |                  |             |
| Residue                              | Average (kJ/mol) | StDev (+/-) | Residue | Average (kJ/mol) | StDev (+/-) |         |                  |             |
| G216                                 | -9.349           | 0.864       | W215    | -13.004          | 0.569       |         |                  |             |
| Q192                                 | -7.205           | 0.455       | F174    | -10.513          | 0.380       |         |                  |             |
| F174                                 | -6.666           | 1.385       | Q192    | -8.539           | 1.215       |         |                  |             |
| C220                                 | -6.510           | 0.627       | Y99     | -8.494           | 1.424       |         |                  |             |
| K224                                 | -6.257           | 0.905       | C191    | -5.529           | 0.611       |         |                  |             |
| K173                                 | -5.636           | 0.899       | K98     | -5.020           | 0.084       |         |                  |             |
| K148                                 | -4.606           | 0.414       | G216    | -4.538           | 0.603       |         |                  |             |
| C191                                 | -4.413           | 0.604       | C220    | -4.095           | 0.540       |         |                  |             |
| Y99                                  | -4.391           | 1.704       | E217    | -3.596           | 0.667       |         |                  |             |
| W215                                 | -4.130           | 0.390       | E219    | -2.313           | 0.189       |         |                  |             |

**Table S1.** The highest top 10 residues of residual contribution energy between 11 ligands and FIXa.

| Data 1 : FIXa selective              |                  |             |         |                  |             |         |                  |             |
|--------------------------------------|------------------|-------------|---------|------------------|-------------|---------|------------------|-------------|
| FXa:1                                |                  |             | FXa:2   |                  |             | FXa:3   |                  |             |
| Residue                              | Average (kJ/mol) | StDev (+/-) | Residue | Average (kJ/mol) | StDev (+/-) | Residue | Average (kJ/mol) | StDev (+/-) |
| W215                                 | -11.498          | 0.899       | W215    | -10.979          | 4.967       | E217    | -11.297          | 0.736       |
| G216                                 | -11.244          | 0.673       | G216    | -9.498           | 1.854       | G216    | -10.967          | 0.253       |
| C220                                 | -8.008           | 0.126       | F174    | -7.921           | 2.994       | W215    | -7.930           | 0.267       |
| Y99                                  | -6.925           | 1.464       | G218    | -6.207           | 0.552       | C220    | -6.610           | 0.243       |
| E217                                 | -6.843           | 2.168       | C220    | -5.399           | 0.869       | G218    | -5.422           | 0.160       |
| Q192                                 | -5.628           | 0.369       | C191    | -5.298           | 0.483       | Q192    | -4.945           | 0.191       |
| F174                                 | -4.911           | 1.554       | Q192    | -4.639           | 1.293       | C191    | -4.499           | 0.175       |
| C191                                 | -4.404           | 0.149       | E217    | -4.358           | 2.464       | G226    | -3.670           | 0.150       |
| G218                                 | -3.852           | 0.317       | Y99     | -4.139           | 3.095       | A190    | -3.012           | 0.716       |
| A190                                 | -3.775           | 0.336       | K224    | -3.446           | 0.076       | F174    | -2.558           | 0.069       |
| Data 2 : FXa selective               |                  |             |         |                  |             |         |                  |             |
| FXa:4                                |                  |             | FXa:5   |                  |             | FXa:6   |                  |             |
| Residue                              | Average (kJ/mol) | StDev (+/-) | Residue | Average (kJ/mol) | StDev (+/-) | Residue | Average (kJ/mol) | StDev (+/-) |
| W215                                 | -24.941          | 0.096       | W215    | -10.367          | 1.067       | G216    | -14.580          | 0.115       |
| Y99                                  | -7.784           | 0.541       | F174    | -9.237           | 0.359       | W215    | -9.641           | 0.875       |
| Q192                                 | -5.785           | 0.184       | Y99     | -8.241           | 0.355       | E217    | -7.703           | 0.528       |
| C220                                 | -5.473           | 1.188       | G219    | -6.472           | 2.093       | Q192    | -7.544           | 0.530       |
| F174                                 | -5.393           | 2.739       | C220    | -5.306           | 0.252       | F174    | -7.448           | 0.267       |
| C191                                 | -4.840           | 1.556       | Q192    | -4.765           | 1.288       | R143    | -6.133           | 0.176       |
| K147                                 | -4.556           | 0.211       | R222    | -4.295           | 1.410       | K147    | -5.929           | 0.276       |
| E217                                 | -3.728           | 0.093       | E217    | -4.256           | 1.403       | Y99     | -5.750           | 0.374       |
| V213                                 | -2.961           | 0.284       | K96     | -2.363           | 0.295       | G219    | -4.931           | 0.429       |
| K96                                  | -2.663           | 0.718       | T98     | -2.296           | 0.515       | I16     | -4.362           | 0.145       |
| Data3 : Active for both FIXa & Fxa   |                  |             |         |                  |             |         |                  |             |
| FXa:7                                |                  |             | Fxa:8   |                  |             | FXa:9   |                  |             |
| Residue                              | Average (kJ/mol) | StDev (+/-) | Residue | Average (kJ/mol) | StDev (+/-) | Residue | Average (kJ/mol) | StDev (+/-) |
| W215                                 | -15.345          | 0.397       | W215    | -16.429          | 0.317       | W215    | -14.571          | 0.896       |
| F174                                 | -10.576          | 0.894       | F174    | -10.369          | 0.269       | F174    | -10.420          | 0.862       |
| G216                                 | -10.319          | 0.518       | G216    | -9.234           | 0.399       | G216    | -9.652           | 0.388       |
| C191                                 | -6.401           | 0.259       | Q192    | -8.174           | 0.762       | E217    | -6.977           | 0.702       |
| Q192                                 | -6.384           | 0.174       | Y99     | -7.442           | 1.968       | Y99     | -6.616           | 0.785       |
| Y99                                  | -5.922           | 0.466       | E217    | -7.400           | 0.688       | Q192    | -5.215           | 2.139       |
| E217                                 | -4.952           | 0.290       | C191    | -5.139           | 1.481       | C191    | -4.380           | 1.763       |
| C220                                 | -4.715           | 0.218       | C220    | -3.783           | 0.451       | G218    | -4.353           | 0.822       |
| R222                                 | -3.098           | 0.319       | G218    | -2.738           | 0.638       | C220    | -4.218           | 0.419       |
| G218                                 | -2.804           | 0.454       | V213    | -2.456           | 0.108       | V213    | -1.863           | 0.510       |
| Data4 : Inactive for both FIXa & Fxa |                  |             |         |                  |             |         |                  |             |
| FXa:10                               |                  |             | FXa:11  |                  |             |         |                  |             |
| Residue                              | Average (kJ/mol) | StDev (+/-) | Residue | Average (kJ/mol) | StDev (+/-) |         |                  |             |
| G216                                 | -11.067          | 0.541       | W215    | -12.510          | 0.361       |         |                  |             |
| W215                                 | -7.723           | 1.796       | F174    | -10.059          | 0.458       |         |                  |             |
| C220                                 | -6.588           | 1.636       | Q192    | -8.608           | 0.343       |         |                  |             |
| Q192                                 | -6.224           | 0.218       | E217    | -6.204           | 0.268       |         |                  |             |
| E217                                 | -5.116           | 2.336       | E146    | -6.131           | 0.170       |         |                  |             |
| C191                                 | -4.467           | 0.504       | Y99     | -5.589           | 1.656       |         |                  |             |
| G218                                 | -3.807           | 1.365       | G216    | -5.294           | 0.346       |         |                  |             |
| A190                                 | -3.794           | 1.547       | C220    | -5.011           | 0.252       |         |                  |             |
| G226                                 | -3.543           | 0.284       | C191    | -4.845           | 0.169       |         |                  |             |
| S173                                 | -3.096           | 1.430       | G218    | -2.695           | 1.398       |         |                  |             |

Table S2. The highest top 10 residues of residual contribution energy between 11 ligands and FXa.

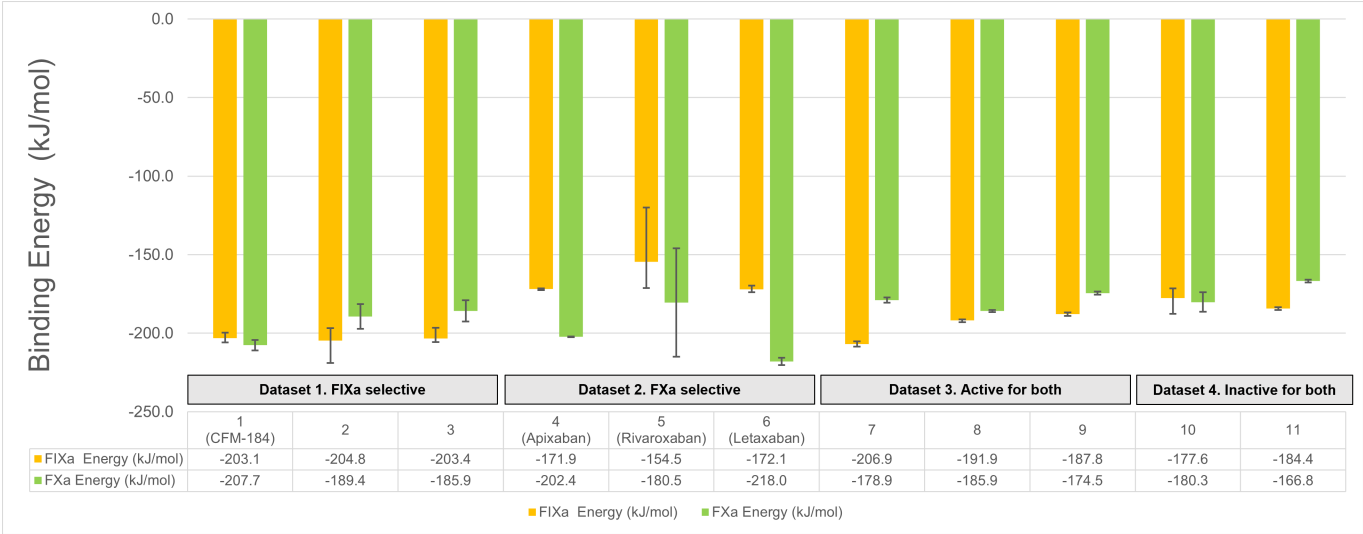

**Figure S4.** Average protein-ligand binding free energy on last 10ns simulation of 3 replicated 100ns simulations. The binding free energy between of ligand and FIXa marked in yellow, FXa marked in green.

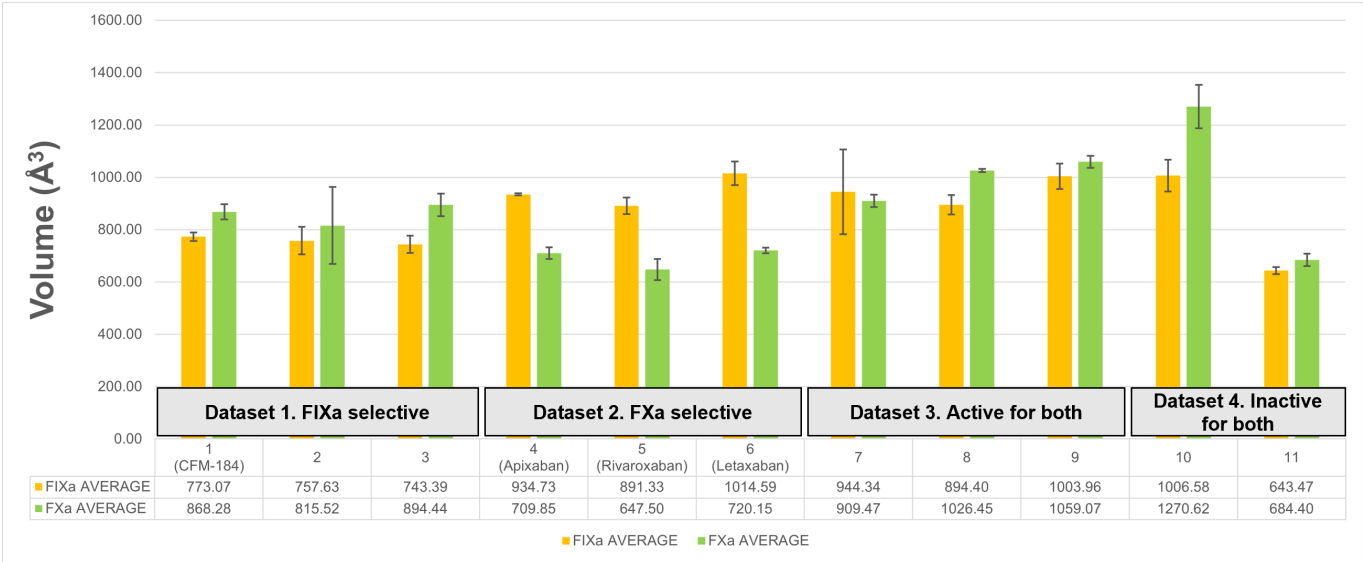

**Figure S5.** Average binding site volume of FIXa (Yellow) and FXa (Green) of 3 replicated simulations on each system.

**Table S3.** The protein-ligand interaction of FIXa and FXa complex during the dynamics.

| Protein | Dataset   | Compound | PDB ID | H-Bond               |                      |                      |                          |                      |                     | Pi-Pi Stacking      |                      |                      |                      |
|---------|-----------|----------|--------|----------------------|----------------------|----------------------|--------------------------|----------------------|---------------------|---------------------|----------------------|----------------------|----------------------|
| FIXa    | Dataset 1 | 1        | 5TNT   | D189<br>0.78 (±0.08) | S190<br>0.68 (±0.05) | G216<br>0.79 (±0.02) |                          |                      |                     | Y99<br>0.97 (±0.01) | F174<br>0.92 (±0.01) | W215<br>0.97 (±0.00) |                      |
|         |           | 2        | 5TNO   | D189<br>0.68 (±0.19) | S190<br>0.80 (±0.07) | G216<br>0.69 (±0.17) |                          |                      |                     | Y99<br>0.96 (±0.02) | F174<br>0.94 (±0.03) | W215<br>0.94 (±0.00) |                      |
|         | Dataset 3 | 7        | 4ZAE   |                      |                      | G216<br>0.97 (±0.05) |                          |                      |                     | Y99<br>0.98 (±0.01) | F174<br>0.94 (±0.00) | W215<br>0.93 (±0.00) | H147<br>0.64 (±0.13) |
|         | Dataset 4 | 11       | 4YZU   |                      |                      | G216<br>0.84 (±0.03) |                          |                      |                     | Y99<br>0.98 (±0.01) | F174<br>0.98 (±0.01) | W215<br>0.90 (±0.02) |                      |
| FXa     | Dataset 2 | 4        | 2P16   |                      |                      | G216<br>0.98 (±0.00) |                          | E146<br>0.94 (±0.02) |                     | Y99<br>0.66 (±0.02) |                      | W215<br>0.53 (±0.07) |                      |
|         |           | 5        | 2W26   |                      |                      |                      | G218/219<br>0.95 (±0.02) |                      |                     | Y99<br>0.56 (±0.05) | F174<br>0.64 (±0.03) | W215<br>0.55 (±0.03) |                      |
|         |           | 6        | 3KL6   |                      |                      | G216<br>1.00 (±0.00) | G218/219<br>0.77 (±0.03) |                      | E97<br>0.74 (±0.02) |                     |                      |                      |                      |

**Table S4.** The protein-ligand interaction of co-crystal structure from Kundu et. al. (2021) [3].

| Protein | Dataset   | Compound | PDB ID | H-Bond |      |      |      |      |      |     | Halogen Bond | Pi-Pi Stacking |      |     |
|---------|-----------|----------|--------|--------|------|------|------|------|------|-----|--------------|----------------|------|-----|
| FIXa    | Dataset 1 | 1        | 5TNT   | D189   | S190 | G216 | -    | -    | -    | -   | G216         | F174           | -    | -   |
|         |           | 2        | 5TNO   | D189   | S190 | G216 | -    | -    | -    | -   | G216         | -              | -    | -   |
|         | Dataset 3 | 7        | 4ZAE   | -      | -    | G216 | -    | -    | -    | -   | G216         | F174           | -    | -   |
|         | Dataset 4 | 11       | 4YZU   | -      | -    | -    | -    | -    | -    | -   | -            | F174           | W215 | -   |
| FXa     | Dataset 2 | 4        | 2P16   | -      | -    | G216 | -    | E146 | -    | -   | -            | -              | -    | Y99 |
|         |           | 5        | 2W26   | -      | -    | -    | G219 | -    | -    | -   | -            | -              | -    | Y99 |
|         |           | 6        | 3KL6   | -      | -    | G216 | G219 | -    | Q192 | E97 | -            | -              | -    | Y99 |

**Table S5.** The protein-ligand interactions of FIXa complex more than 40% occupancy during the dynamics. The highlighted color blocks represent interaction type (Green: Common interaction with all ligands, Yellow: common interaction with active ligands, Orange: Interaction with only selective ligands, Blue: Interaction with active ligands without selectivity).

| Subsite | Residue | Interaction | Dataset 1. FIXa selective |             |             | Dataset 2. FXa selective |             |             | Dataset 3. Active for bothn FIXa & FXa |             |             | Dataset 4. Inactive for bothn FIXa & FXa |             |
|---------|---------|-------------|---------------------------|-------------|-------------|--------------------------|-------------|-------------|----------------------------------------|-------------|-------------|------------------------------------------|-------------|
|         |         |             | FIXa:1                    | FIXa:2      | FIXa:3      | FIXa:4                   | FIXa:5      | FIXa:6      | FIXa:7                                 | FIXa:8      | FIXa:9      | FIXa:10                                  | FIXa:11     |
|         |         |             | Average                   | Average     | Average     | Average                  | Average     | Average     | Average                                | Average     | Average     | Average                                  | Average     |
| S4      | I96     | HBDonor     | -                         | -           | -           | -                        | -           | 0.68 (0.02) | -                                      | -           | -           | -                                        | -           |
| S4      | N97     | Hydrophobic | 0.64 (0.02)               | -           | -           | -                        | -           | 0.97 (0.00) | -                                      | -           | -           | -                                        | -           |
| S4      | Y99     | Hydrophobic | 1.00 (0.00)               | 1.00 (0.00) | 1.00 (0.00) | 1.00 (0.00)              | 1.00 (0.00) | 1.00 (0.00) | 1.00 (0.00)                            | 1.00 (0.00) | 1.00 (0.00) | 0.97 (0.01)                              | 1.00 (0.00) |
| S4      | Y99     | PiStacking  | 0.97 (0.01)               | 0.96 (0.02) | 0.97 (0.01) | -                        | 0.61 (0.07) | -           | 0.98 (0.01)                            | 0.95 (0.02) | 0.95 (0.03) | 0.80 (0.13)                              | 0.98 (0.01) |
| S2      | R143    | Hydrophobic | -                         | -           | -           | -                        | -           | -           | 0.81 (0.17)                            | 0.87 (0.08) | 0.93 (0.03) | -                                        | -           |
| S2      | H147    | Hydrophobic | 0.89 (0.04)               | -           | -           | -                        | -           | -           | 0.84 (0.12)                            | 0.83 (0.09) | 0.85 (0.09) | 0.57 (0.08)                              | 0.41 (0.01) |
| S2      | H147    | PiStacking  | -                         | -           | -           | -                        | -           | -           | 0.64 (0.13)                            | 0.65 (0.12) | 0.70 (0.08) | -                                        | -           |
| S2      | K148    | Hydrophobic | -                         | -           | -           | -                        | -           | -           | 0.80 (0.10)                            | 0.87 (0.03) | 0.84 (0.05) | -                                        | -           |
| S3-S4   | F174    | Hydrophobic | 1.00 (0.00)               | 1.00 (0.00) | 1.00 (0.00) | 0.98 (0.02)              | 1.00 (0.01) | 1.00 (0.00) | 1.00 (0.00)                            | 0.98 (0.03) | 0.92 (0.07) | 0.99 (0.01)                              | 1.00 (0.00) |
| S3-S4   | F174    | PiStacking  | 0.92 (0.01)               | 0.94 (0.03) | 0.97 (0.00) | 0.50 (0.08)              | 0.67 (0.13) | -           | 0.94 (0.00)                            | 0.87 (0.06) | 0.86 (0.06) | 0.89 (0.10)                              | 0.98 (0.01) |
|         | Y177    | Hydrophobic | -                         | -           | -           | 0.51 (0.03)              | -           | -           | -                                      | -           | -           | -                                        | -           |
| S1      | D189    | HBDonor     | 0.78 (0.08)               | 0.68 (0.19) | 0.86 (0.04) | -                        | -           | -           | -                                      | -           | -           | 0.85 (0.05)                              | -           |
| S1      | D189    | Hydrophobic | -                         | -           | 0.62 (0.07) | -                        | -           | -           | -                                      | -           | -           | -                                        | -           |
| S1      | S190    | Hydrophobic | 1.00 (0.00)               | 0.98 (0.01) | 1.00 (0.00) | 0.98 (0.01)              | 0.97 (0.01) | 0.84 (0.03) | 0.99 (0.01)                            | 1.00 (0.00) | 1.00 (0.00) | 1.00 (0.00)                              | 1.00 (0.00) |
| S1      | S190    | HBDonor     | 0.68 (0.05)               | 0.80 (0.07) | -           | -                        | -           | -           | -                                      | -           | -           | 0.59 (0.06)                              | -           |
| S1      | C191    | Hydrophobic | 1.00 (0.00)               | 1.00 (0.00) | 1.00 (0.00) | 1.00 (0.00)              | 1.00 (0.00) | 1.00 (0.00) | 1.00 (0.00)                            | 1.00 (0.00) | 1.00 (0.00) | 1.00 (0.00)                              | 1.00 (0.00) |
| S1      | Q192    | Hydrophobic | 0.99 (0.00)               | 1.00 (0.00) | 1.00 (0.00) | 1.00 (0.00)              | 1.00 (0.00) | 0.99 (0.00) | 1.00 (0.00)                            | 1.00 (0.00) | 1.00 (0.00) | 0.99 (0.01)                              | 1.00 (0.00) |
| S1      | S195    | Hydrophobic | -                         | -           | -           | -                        | -           | -           | 0.97 (0.01)                            | 0.97 (0.01) | 0.99 (0.00) | -                                        | 0.93 (0.05) |
| S1      | I213    | Hydrophobic | 0.93 (0.02)               | -           | 0.86 (0.07) | 0.99 (0.00)              | 0.81 (0.06) | 0.97 (0.00) | 0.99 (0.01)                            | 1.00 (0.00) | 1.00 (0.00) | 0.92 (0.03)                              | 0.98 (0.01) |
| S1      | S214    | Hydrophobic | 0.69 (0.02)               | -           | -           | 0.91 (0.02)              | 0.66 (0.12) | 0.92 (0.02) | 1.00 (0.00)                            | 0.99 (0.00) | 1.00 (0.00) | 0.67 (0.03)                              | 0.94 (0.04) |
| S1      | W215    | Hydrophobic | 1.00 (0.00)               | 1.00 (0.00) | 1.00 (0.00) | 1.00 (0.00)              | 1.00 (0.00) | 1.00 (0.00) | 1.00 (0.00)                            | 1.00 (0.00) | 1.00 (0.00) | 1.00 (0.00)                              | 1.00 (0.00) |
| S1      | W215    | PiStacking  | 0.97 (0.00)               | 0.94 (0.00) | 0.88 (0.03) | 0.74 (0.09)              | 0.57 (0.10) | -           | 0.93 (0.00)                            | 0.91 (0.01) | 0.91 (0.01) | -                                        | 0.90 (0.02) |
| S1      | G216    | Hydrophobic | 1.00 (0.00)               | 1.00 (0.00) | 1.00 (0.00) | 1.00 (0.00)              | 1.00 (0.00) | 1.00 (0.00) | 1.00 (0.00)                            | 1.00 (0.00) | 1.00 (0.00) | 1.00 (0.00)                              | 1.00 (0.00) |
| S1      | G216    | HBAcceptor  | -                         | -           | -           | 0.95 (0.02)              | -           | -           | -                                      | -           | -           | -                                        | -           |
| S1      | G216    | HBDonor     | 0.79 (0.02)               | 0.69 (0.17) | 0.86 (0.03) | -                        | -           | 0.85 (0.01) | 0.97 (0.05)                            | 1.00 (0.00) | 1.00 (0.00) | 0.87 (0.02)                              | 0.84 (0.03) |
| S1      | E217    | Hydrophobic | 1.00 (0.00)               | 0.84 (0.13) | 0.96 (0.01) | -                        | 0.76 (0.05) | 0.91 (0.01) | 0.93 (0.04)                            | 0.93 (0.02) | 0.95 (0.03) | 0.98 (0.01)                              | 0.91 (0.04) |
| S1      | E219    | Hydrophobic | 0.56 (0.04)               | -           | -           | -                        | -           | -           | -                                      | -           | -           | -                                        | -           |
| S1      | C220    | Hydrophobic | 0.99 (0.00)               | 1.00 (0.00) | 1.00 (0.00) | 0.99 (0.01)              | 0.79 (0.09) | 0.97 (0.00) | 0.90 (0.11)                            | 0.94 (0.05) | 0.97 (0.03) | 1.00 (0.00)                              | 0.92 (0.03) |
| S1      | G226    | Hydrophobic | -                         | -           | 0.64 (0.05) | -                        | -           | -           | -                                      | -           | -           | -                                        | -           |

\* represent that the compound has the co-crystal structures.



**Table S6.** The protein-ligand interactions of FXa complex more than 40% occupancy during the dynamics. The highlighted color blocks represent interaction type (Green: Common interaction with all ligands, Yellow: common interaction with active ligands, Orange: Interaction with only selective ligands, Blue: Interaction with active ligands without selectivity).

| Subsite | Residue  | Interaction | Dataset 1. FIXa selective |             |             | Dataset 2. FXa selective |             |             | Dataset 3. Active for bothn FIXa & FXa |             |             | Dataset 4. Inactive for bothn FIXa & FXa |             |
|---------|----------|-------------|---------------------------|-------------|-------------|--------------------------|-------------|-------------|----------------------------------------|-------------|-------------|------------------------------------------|-------------|
|         |          |             | FXa:1                     | FXa:2       | FXa:3       | FXa:4                    | FXa:5       | FXa:6       | FXa:7                                  | FXa:8       | FXa:9       | FXa:10                                   | FXa:11      |
|         |          |             | Average                   | Average     | Average     | Average                  | Average     | Average     | Average                                | Average     | Average     | Average                                  | Average     |
| S4      | E97      | Hydrophobic | -                         | -           | -           | 0.75 (0.11)              | 0.89 (0.01) | 0.54 (0.04) | -                                      | -           | -           | -                                        | -           |
| S4      | E97      | HBDonor     | -                         | -           | -           | -                        | -           | 0.74 (0.02) | -                                      | -           | -           | -                                        | -           |
| S4      | T98      | Hydrophobic | 0.64 (0.13)               | -           | -           | 0.98 (0.01)              | 0.99 (0.00) | 0.97 (0.01) | 0.55 (0.08)                            | -           | -           | -                                        | -           |
| S4      | Y99      | Hydrophobic | 0.98 (0.02)               | 0.95 (0.03) | 0.93 (0.02) | 1.00 (0.00)              | 1.00 (0.00) | 1.00 (0.00) | 1.00 (0.00)                            | 1.00 (0.00) | 1.00 (0.00) | -                                        | 1.00 (0.00) |
| S4      | Y99      | PiStacking  | 0.74 (0.05)               | -           | -           | 0.66 (0.02)              | 0.56 (0.05) | -           | 0.81 (0.02)                            | 0.85 (0.04) | 0.86 (0.04) | -                                        | 0.79 (0.07) |
| S2      | R143     | Hydrophobic | -                         | -           | -           | -                        | -           | -           | 0.74 (0.11)                            | -           | 0.58 (0.12) | -                                        | -           |
| S2      | E146     | Hydrophobic | 0.76 (0.01)               | -           | -           | 0.75 (0.03)              | -           | -           | 0.92 (0.01)                            | 0.86 (0.05) | 0.91 (0.02) | -                                        | -           |
| S2      | E146     | HBDonor     | -                         | -           | -           | 0.94 (0.02)              | -           | -           | -                                      | -           | -           | -                                        | -           |
| S3-S4   | S173     | Hydrophobic | -                         | -           | 0.79 (0.01) | -                        | -           | -           | -                                      | -           | -           | -                                        | -           |
| S3-S4   | F174     | Hydrophobic | 0.98 (0.01)               | 0.98 (0.02) | -           | 0.98 (0.01)              | 1.00 (0.00) | 1.00 (0.00) | 1.00 (0.00)                            | 0.99 (0.00) | 0.98 (0.02) | 0.86 (0.11)                              | 1.00 (0.00) |
| S3-S4   | F174     | PiStacking  | 0.77 (0.05)               | 0.87 (0.11) | -           | -                        | 0.64 (0.03) | -           | 0.91 (0.01)                            | 0.86 (0.01) | 0.86 (0.03) | -                                        | 0.96 (0.00) |
| S1      | D189     | HBDonor     | 0.91 (0.02)               | 0.64 (0.04) | 0.91 (0.01) | -                        | -           | -           | -                                      | -           | -           | 0.80 (0.08)                              | -           |
| S1      | A190     | Hydrophobic | 1.00 (0.00)               | 0.97 (0.01) | 1.00 (0.00) | 0.89 (0.01)              | 0.97 (0.03) | 1.00 (0.00) | 0.99 (0.00)                            | 0.85 (0.03) | 0.97 (0.01) | 0.99 (0.01)                              | 0.99 (0.00) |
| S1      | A190     | HBDonor     | 0.55 (0.03)               | 0.71 (0.03) | 0.50 (0.06) | -                        | -           | -           | -                                      | -           | -           | 0.57 (0.11)                              | -           |
| S1      | C191     | Hydrophobic | 1.00 (0.00)               | 1.00 (0.00) | 1.00 (0.00) | 1.00 (0.00)              | 0.99 (0.01) | 1.00 (0.00) | 1.00 (0.00)                            | 0.97 (0.02) | 0.99 (0.01) | 0.99 (0.00)                              | 1.00 (0.00) |
| S1      | Q192     | Hydrophobic | 0.98 (0.01)               | 1.00 (0.00) | 1.00 (0.00) | 1.00 (0.00)              | 0.86 (0.11) | 1.00 (0.00) | 1.00 (0.00)                            | 1.00 (0.00) | 1.00 (0.00) | 0.98 (0.00)                              | 1.00 (0.00) |
| S1      | S195     | Hydrophobic | -                         | -           | -           | -                        | -           | -           | 0.74 (0.07)                            | 0.77 (0.04) | 0.74 (0.09) | -                                        | 0.98 (0.01) |
| S1      | V213     | Hydrophobic | 0.99 (0.00)               | 0.62 (0.05) | 0.95 (0.04) | 1.00 (0.00)              | 1.00 (0.00) | 1.00 (0.00) | 1.00 (0.00)                            | 0.99 (0.01) | 1.00 (0.00) | 0.99 (0.00)                              | 1.00 (0.00) |
| S1      | S214     | Hydrophobic | 0.58 (0.13)               | 0.78 (0.03) | 0.77 (0.08) | 0.90 (0.03)              | 0.57 (0.09) | 0.99 (0.00) | 0.94 (0.01)                            | 0.97 (0.01) | 0.94 (0.03) | 0.83 (0.03)                              | 0.99 (0.00) |
| S1      | W215     | Hydrophobic | 1.00 (0.00)               | 1.00 (0.00) | 1.00 (0.00) | 1.00 (0.00)              | 1.00 (0.00) | 1.00 (0.00) | 1.00 (0.00)                            | 1.00 (0.00) | 1.00 (0.00) | 1.00 (0.00)                              | 1.00 (0.00) |
| S1      | W215     | PiStacking  | 0.97 (0.01)               | 0.78 (0.18) | 0.60 (0.04) | 0.53 (0.07)              | 0.55 (0.03) | -           | 0.96 (0.02)                            | 0.95 (0.01) | 0.91 (0.05) | 0.57 (0.13)                              | 0.92 (0.01) |
| S1      | G216     | Hydrophobic | 1.00 (0.00)               | 1.00 (0.00) | 1.00 (0.00) | 1.00 (0.00)              | 1.00 (0.00) | 1.00 (0.00) | 1.00 (0.00)                            | 1.00 (0.00) | 1.00 (0.00) | 1.00 (0.00)                              | 1.00 (0.00) |
| S1      | G216     | HBDonor     | 0.81 (0.02)               | 0.75 (0.08) | 0.96 (0.01) | -                        | -           | 1.00 (0.00) | 1.00 (0.00)                            | 1.00 (0.00) | 1.00 (0.00) | 0.88 (0.04)                              | 0.56 (0.10) |
| S1      | G216     | HBAcceptor  | -                         | -           | -           | 0.98 (0.00)              | -           | -           | -                                      | -           | -           | -                                        | -           |
| S1      | E217     | Hydrophobic | 0.91 (0.02)               | 0.73 (0.09) | 0.99 (0.00) | -                        | 0.96 (0.02) | 0.53 (0.06) | 0.92 (0.03)                            | 0.93 (0.03) | 0.97 (0.02) | 0.90 (0.08)                              | 0.85 (0.07) |
| S1      | G218/219 | Hydrophobic | 0.97 (0.01)               | 0.91 (0.01) | 0.84 (0.01) | 0.54 (0.12)              | 0.98 (0.01) | -           | 0.71 (0.05)                            | 0.71 (0.07) | 0.84 (0.04) | 0.90 (0.02)                              | 0.80 (0.03) |
| S1      | G218/219 | HBDonor     | -                         | -           | -           | -                        | 0.85 (0.09) | -           | -                                      | -           | -           | -                                        | 0.87 (0.04) |
| S1      | G218/219 | HBAcceptor  | -                         | -           | -           | -                        | 0.95 (0.02) | 0.77 (0.03) | -                                      | -           | -           | -                                        | -           |
| S1      | C220     | Hydrophobic | 1.00 (0.00)               | 1.00 (0.00) | 1.00 (0.00) | 0.94 (0.08)              | 0.98 (0.02) | 1.00 (0.00) | 0.97 (0.01)                            | 0.84 (0.10) | -           | 0.94 (0.09)                              | 0.95 (0.01) |
| S1      | G226     | Hydrophobic | -                         | -           | 0.73 (0.06) | 0.96 (0.01)              | 0.89 (0.13) | 0.92 (0.01) | 0.65 (0.06)                            | -           | 0.50 (0.07) | 0.87 (0.11)                              | -           |
| S1      | I227     | Hydrophobic | -                         | -           | -           | 0.69 (0.08)              | -           | 0.84 (0.03) | -                                      | -           | -           | -                                        | -           |
| S1      | Y228     | Hydrophobic | -                         | -           | -           | 0.87 (0.05)              | 0.72 (0.13) | 0.96 (0.00) | -                                      | -           | -           | -                                        | -           |

\* represent that the compound has the co-crystal structures.

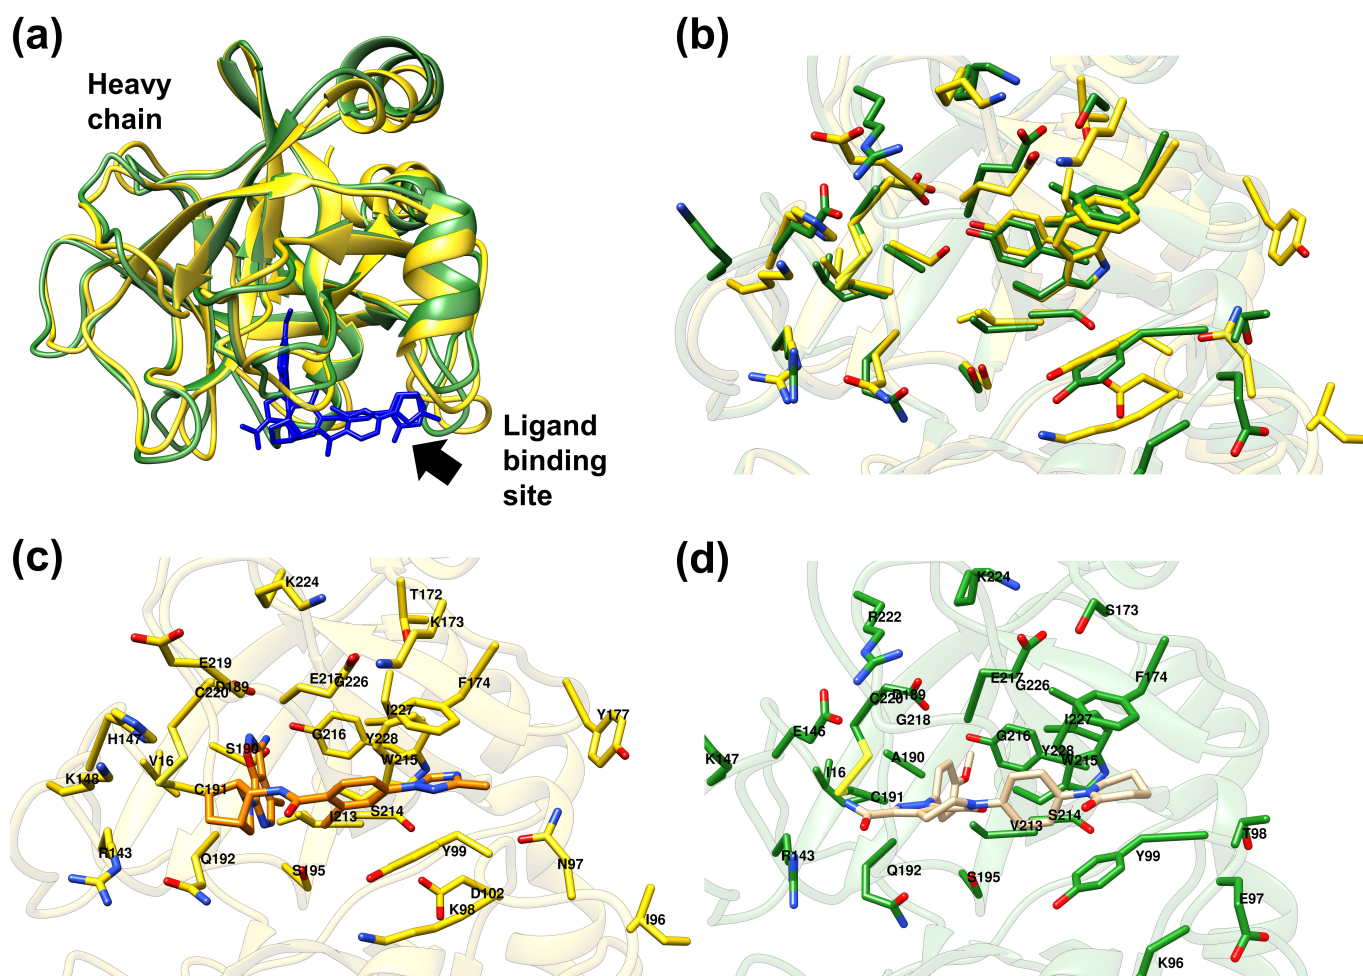

**Figure S6.** The crystal structure and ligand binding site of Factor IXa and Factor Xa. (a) The crystal structure of FIXa (Yellow, PDB 5TNT) and FXa (Green, PDB 2P16). (b) Superimposed binding site residues of FIXa (Yellow) and FXa (Green). (c) The binding site residues of FIXa and CFM-184 (Orange). (d) The binding site residues of FXa and Apixaban (Tan).

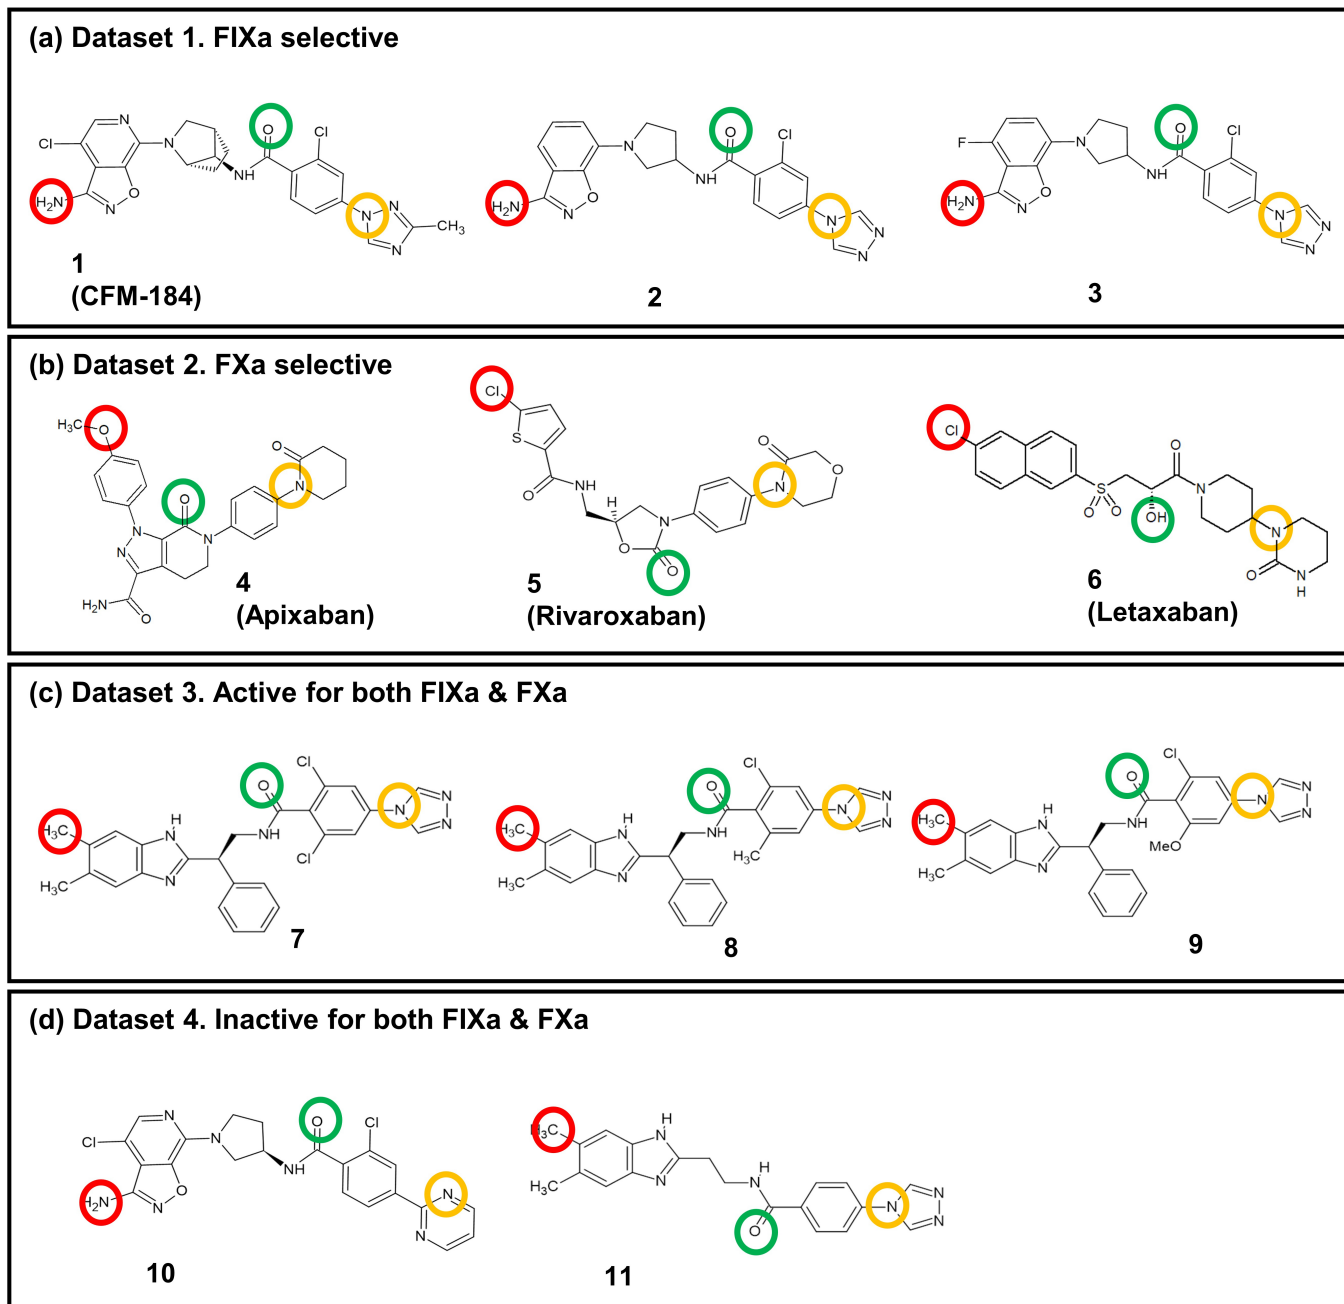

**Figure S7.** The selected atoms for ligand dynamic analysis. The red, green and yellow circle indicated ligand atoms of P1, P2 and P4, respectively.

## References

1. Fischer, P.M. Design of Small-Molecule Active-Site Inhibitors of the S1A Family Proteases as Procoagulant and Anticoagulant Drugs. *Journal of Medicinal Chemistry* **2018**, *61*, 3799–3822. <https://doi.org/10.1021/acs.jmedchem.7b00772>.
2. Kabankin, A.S.; Sinauridze, E.I.; Lipets, E.N.; Ataulakhanov, F.I. Computer Design of Low-Molecular-Weight Inhibitors of Coagulation Factors. *Biochemistry (Moscow)* **2019**, *84*, 119–136. <https://doi.org/10.1134/S0006297919020032>.
3. Kundu, S.; Wu, S. A Structure Based Study of Selective Inhibition of Factor IXa over Factor Xa. *Molecules* **2021**, *26*, 5372. <https://doi.org/10.3390/molecules26175372>.
